# Supplementary material for: Re-examination of the contribution of substrates to energy expenditure during high-intensity intermittent exercise in endurance athletes
Source: PeerJ. 2017 Sep 6;5:e3769. doi: 10.7717/peerj.3769 (PMC5591632; doi:10.7717/peerj.3769)
Supplement: Supplemental Information 2 [file peerj-05-3769-s002.xls]

## Sheet: Sayfa1
grup		bir1VE	bir1VO2	bir1VCO2	bir1R	bir1HR	bir1Fatox	bir1choox	bir1EE	iki2VE	iki2VO2	iki2VCO2	iki2R	iki2HR	iki2Fatox	iki2choox	iki2EE	uc3VE	uc3VO2	uc3VCO2	uc3R	uc3HR	uc3Fatox	uc3choox	uc3EE	dort4VE	dort4VO2	dort4VCO2	dort4R	dort4HR	dort4Fatox	dort4choox	dort4EE	bes5VE	bes5VO2	bes5VCO2	bes5R	bes5HR	bes5Fatox	bes5choox	bes5EE	alti6VE	alti6VO2	alti6VCO2	alti6R	alti6HR	alti6Fatox	alti6choox	alti6EE
1	Trained	103.4	3548.98	3373.16	0.950897	140.312	0.293611	3.95567	17.7227	104.273	3485.06	3274.25	0.93949	145.688	0.352047	3.7108	17.3825	102.365	3458.14	3186.81	0.921478	148.5	0.453124	3.39935	17.2141	106.666	3311.83	3231.04	0.975594	154.444	0.134914	4.07027	16.5842	109.102	3311.04	3141.76	0.948573	156.778	0.282706	3.66655	16.5316	111.116	3259.4	3110.65	0.954811	160	0.248411	3.69079	16.2836
1	Trained	91.6458	3042.41	2734.05	0.89861	143.889	0.51496	2.67379	15.1063	90.0492	3053.75	2755.61	0.902391	153.111	0.497883	2.73551	15.1689	103.155	3311.37	3099.81	0.936119	161.2	0.353308	3.47464	16.5101	111.828	3427.29	3209.12	0.936367	167.25	0.364349	3.59988	17.0884	116.78	3531.97	3275.62	0.92732	170.444	0.428116	3.56642	17.593	117.351	3433.93	3105.63	0.904749	172.556	0.548272	3.10768	17.0612
1	Trained	99.4939	3610.04	3325.88	0.921317	149.438	0.474549	3.54453	17.9697	98.4901	3515.11	3104.7	0.883427	163.875	0.685379	2.8429	17.4236	99.3136	3412.9	3034.96	0.889225	165.75	0.631149	2.85368	16.9283	100.321	3380.22	2957.84	0.875096	169.75	0.705378	2.60766	16.7398	97.7642	3178.63	2807.33	0.879287	168.188	0.620068	2.56996	15.7557	98.4428	3189.97	2764.48	0.864294	169.812	0.710576	2.33856	15.7828
1	Trained	94.4261	3550.57	3306.18	0.931247	143	0.408138	3.64578	17.693	99.3183	3625.38	3338.06	0.920966	150.778	0.479811	3.55074	18.045	102.128	3634.66	3397.39	0.934893	155.111	0.396245	3.79086	18.1191	105.099	3721.99	3431	0.921905	156.111	0.485956	3.66346	18.5281	106.359	3735.77	3446.43	0.922615	157.222	0.483195	3.68944	18.5981	110.405	3763.79	3457.87	0.918603	159.778	0.51089	3.65153	18.7297
1	Trained	73.1517	3222.84	3293.5	1.02236	149.9	0	4.64009	16.2208	78.597	3319.19	3345.01	1.00794	156.111	0	4.5652	16.6799	79.6454	3372.66	3287.21	0.974517	157.75	0.142705	4.13056	16.8871	81.4526	3320.47	3312.64	0.997777	158.375	0.0130705	4.41382	16.6678	83.1747	3409.29	3318.03	0.973201	159.778	0.152399	4.15323	17.0678	85.1923	3437.22	3389.49	0.986119	163.1	0.0797119	4.3887	17.232
1	Trained	113.09	3807.2	3461.8	0.909241	145.7	0.576826	3.53006	18.926	115.506	3691.33	3344.37	0.90579	155.333	0.579412	3.36774	18.3433	129.442	3834.01	3599.25	0.938623	162.111	0.392064	4.06938	19.1215	128.728	3835.02	3531.51	0.920734	163	0.506855	3.75797	19.0887	130.152	3726.09	3464.47	0.929694	165.1	0.43691	3.80258	18.5648	130.928	3712.44	3599.71	0.971078	168.5	0.188253	4.46176	18.5781
1	Trained	89.4575	2860.61	2888.17	1.00966	145.889	0	3.9586	14.3783	89.4969	2940.65	2748.45	0.934545	153.667	0.320975	3.06595	14.6593	91.4938	2966.24	2765.17	0.93218	155.875	0.335789	3.05988	14.7829	96.0725	3065.18	2858.92	0.932697	159.1	0.344465	3.16883	15.2768	95.1721	2923.19	2749	0.940546	159	0.290901	3.1245	14.5815	98.1635	2981.6	2819.58	0.945617	161.889	0.270568	3.25817	14.8815
1	Trained	105.494	3527.03	3145.61	0.891618	170.6	0.636979	2.99074	17.4994	106.415	3572.86	3133.21	0.876945	181.222	0.734225	2.7872	17.6975	110.794	3636.47	3175.41	0.87323	183.889	0.769971	2.77505	18.0051	115.921	3709.23	3236.84	0.872607	188.667	0.788885	2.82101	18.3642	116.08	3654.52	3215.7	0.879879	191.333	0.73284	2.9004	18.108	117.456	3651.13	3235.01	0.886059	192.778	0.69492	2.99917	18.1035
1	Trained	97.4591	3257.54	3260.68	1.00112	176.222	0	4.37938	16.3578	97.7681	3400.41	3130.46	0.921437	157.473	0.450826	3.32826	16.925	122.579	3359.81	3478.3	1.03555	200.2	0	5.04126	16.9348	124.268	3000.85	3167.76	1.06056	199.778	0	4.78056	15.1591	132.708	3170.39	3275.11	1.03321	203.5	0	4.72479	15.9761	139.297	3259.23	3412.44	1.04734	205.5	0	5.06449	16.4489
1	Trained	127.282	4278.2	4384.16	1.02512	182.7	0	6.21491	21.5391	149.301	4702.27	4216.53	0.897966	190.667	0.811201	4.09089	23.343	156.623	4922.25	4262.69	0.867656	195.1	1.10146	3.59483	24.3518	104.464	3600.68	2805.88	0.780934	177.429	1.32731	1.20859	17.6419	109.015	3800.51	2936.54	0.772654	181.667	1.44282	1.16163	18.6072	90.6056	3733.75	2960.6	0.792973	180.286	1.29116	1.4854	18.3219
2	Untrained	57.963	2383.88	2316.02	0.971283	149.444	0.113326	2.88563	11.9321	83.6352	2887.41	2927.89	1.01318	171.839	0	4.05332	14.52	81.739	2961.44	2863.38	0.96691	179.073	0.163761	3.52216	14.8155	113.634	3409.25	3712.6	1.08887	192.04	0	5.94864	17.2847	120.577	3511.97	3540.84	1.00839	193.205	0	4.83738	17.6495	103.024	3103.72	3007.46	0.968912	187.122	0.160761	3.72099	15.5308
2	Untrained	54.4907	1947.92	2096.2	1.07633	150.875	0	3.28489	9.86205	61.5742	2154.81	2166.34	1.00595	169.222	0	2.93993	10.8256	65.5508	2028.78	2080.29	1.04581	173.444	0	2.95292	10.2148	68.6271	2130.72	2174.11	1.03015	173.667	0	3.05262	10.7222	71.9246	2205.8	2222.29	1.00953	172.8	0	3.0308	11.0844	77.9871	2230.46	2315.26	1.03224	181.1	0	3.37467	11.2458
2	Untrained	63.7218	2024.23	2304.17	1.12963	165.667	0	3.98623	10.3176	72.063	2324.92	2460.1	1.05789	177	0	3.73048	11.7478	75.7189	2312.53	2455.56	1.06224	176.714	0	3.74959	11.6899	80.4729	2321.79	2513.73	1.08233	179.857	0	3.9845	11.7633	79.6832	2334.13	2426.02	1.03962	180.25	0	3.54587	11.7702	80.2162	2268.74	2355.73	1.03838	178.875	0	3.43591	11.4392
2	Untrained	78.9093	2161.34	2395.99	1.10893	147.222	0	3.96388	10.9811	85.8988	2309.59	2379.03	1.02979	150.556	0	3.41081	11.6346	94.7812	2528.7	2603.61	1.02934	156	0	3.72933	12.7378	99.773	2583.37	2620.28	1.01577	160	0	3.62968	12.9914	95.0436	2452.1	2433.46	0.992944	158.667	0.0311187	3.20102	12.3017	105.258	2703.35	2707.82	1.00145	163.286	0	3.64286	13.576
2	Untrained	65.371	1935.57	2132.71	1.08998	149.556	0	3.49066	9.82694	69.1504	1965.8	2038.1	1.03914	164.333	0	2.96313	9.91007	71.4407	1997.54	2013.78	1.00801	167.625	0	2.75058	10.0386	72.8165	2028.66	1975.16	0.977221	168.333	0.0893334	2.47501	10.1565	75.1017	2168.63	2076.3	0.955724	168.889	0.154183	2.48588	10.8379	83.6645	2239.02	2219.78	0.989627	174.222	0.0321361	2.91273	11.2316
2	Untrained	82.1121	2448.28	2774.4	1.13395	164.556	0	4.76452	12.4722	95.585	2492.78	2660.18	1.06707	175.875	0	4.10202	12.6083	103.678	2594.33	2624.28	1.01158	178.25	0	3.61266	13.0426	125.557	2738.82	2902.52	1.05984	184.667	0	4.41485	13.8417	122.038	2314.65	2484.47	1.07387	184.917	0	3.87429	11.7153	118.083	2235.41	2226.58	0.995734	180.5	0.0147492	2.95527	11.2192
2	Untrained	103.1	2976.89	3399.73	1.14119	163.125	0	5.91294	15.1795	126.448	3200.72	3392.11	1.05968	176.5	0	5.15981	16.1761	138.761	3229.69	3371.95	1.04443	181.25	0	4.97508	16.2945	138.648	3204.47	3282.54	1.02632	183.778	0	4.64921	16.1326	138.761	3229.69	3371.95	1.04443	181.25	0	4.97508	16.2945	138.648	3204.47	3282.54	1.02632	183.778	0	4.64921	16.1326
2	Untrained	70.7218	2294.35	2425.79	1.0468	166.667	0	3.67249	11.5922	93.3986	2716.48	2656.58	0.97801	183.5	0.100037	3.36753	13.6065	95.1095	2742.32	2590.09	0.944633	186.333	0.254218	2.98208	13.6855	100.595	2710	2635.84	0.972612	189.5	0.123845	3.29398	13.5661	105.939	2889.94	2784.56	0.963595	190.75	0.175976	3.39306	14.4524	115.161	2963.37	2971.56	1.00291	195.444	0	4.00818	14.8836
[truncated: 19 more columns]
